# Supplementary material for: LINC01094 promotes the invasion of ovarian cancer cells and regulates the Wnt/β-catenin signaling pathway by targeting miR-532-3p
Source: PubMed Central journal article supplement — Exp Ther Med. 2021 Aug 27;22(5):1228. doi: 10.3892/etm.2021.10662 (PMC8438678; doi:10.3892/etm.2021.10662), 2021-08-27

Figure S1. LINC01094 promotes cell cycle progression and inhibits cell apoptosis. OV90 cells were transfected with siLINC01094 or siNC, and A2780 cells were transfected with pcDNA-LINC01094 or empty vector. Cell apoptosis was analyzed by flow cytometry in (A) OV90 and (B) A2780 cells. Cell cycle was analyzed by flow cytometry in (C) OV90 and (D) A2780 cells. \* $P < 0.05$ , \*\* $P < 0.01$ , \*\*\* $P < 0.001$ . LINC01094, long intergenic non-protein coding RNA 1094; NC, negative control; si, small interfering RNA; PI, propidium iodide.

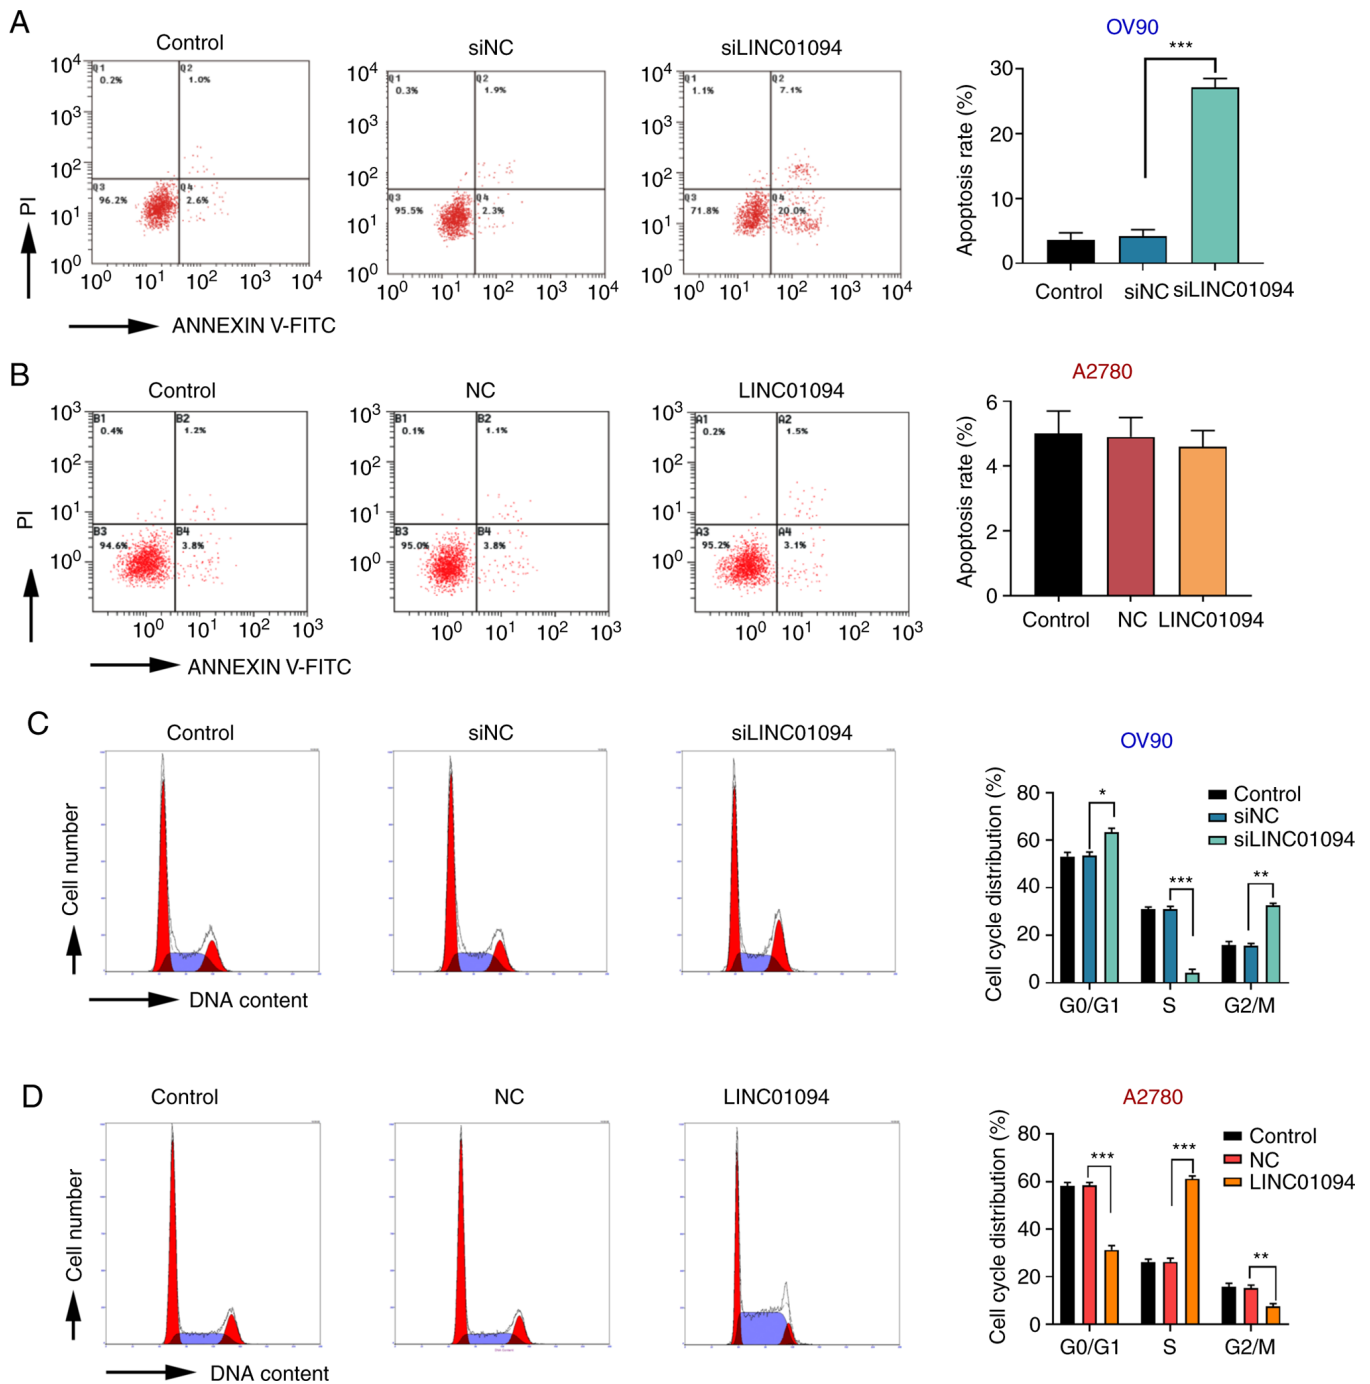

Figure S2. Silencing of the overexpression of LINC01094 attenuates miR-532-3p inhibitor or mimics-mediated effects on cell cycle and apoptosis. miR-532-3p inhibitor (or inhibitor control) and siLINC01094 (or siNC) were transfected into OV90 cells, and miR-532-3p mimics (or mimics control) and pcDNA-LINC01094 (or empty vector) were transfected into A2780 cells. Cell apoptosis was analyzed by flow cytometry in (A) OV90 and (B) A2780 cells. Cell cycle was analyzed by flow cytometry in (C) OV90 and (D) A2780 cells. \* $P < 0.05$ , \*\* $P < 0.01$ , \*\*\* $P < 0.001$ . LINC01094, long intergenic non-protein coding RNA 1094; NC, negative control; si, small interfering RNA; miR, microRNA; PI, propidium iodide.

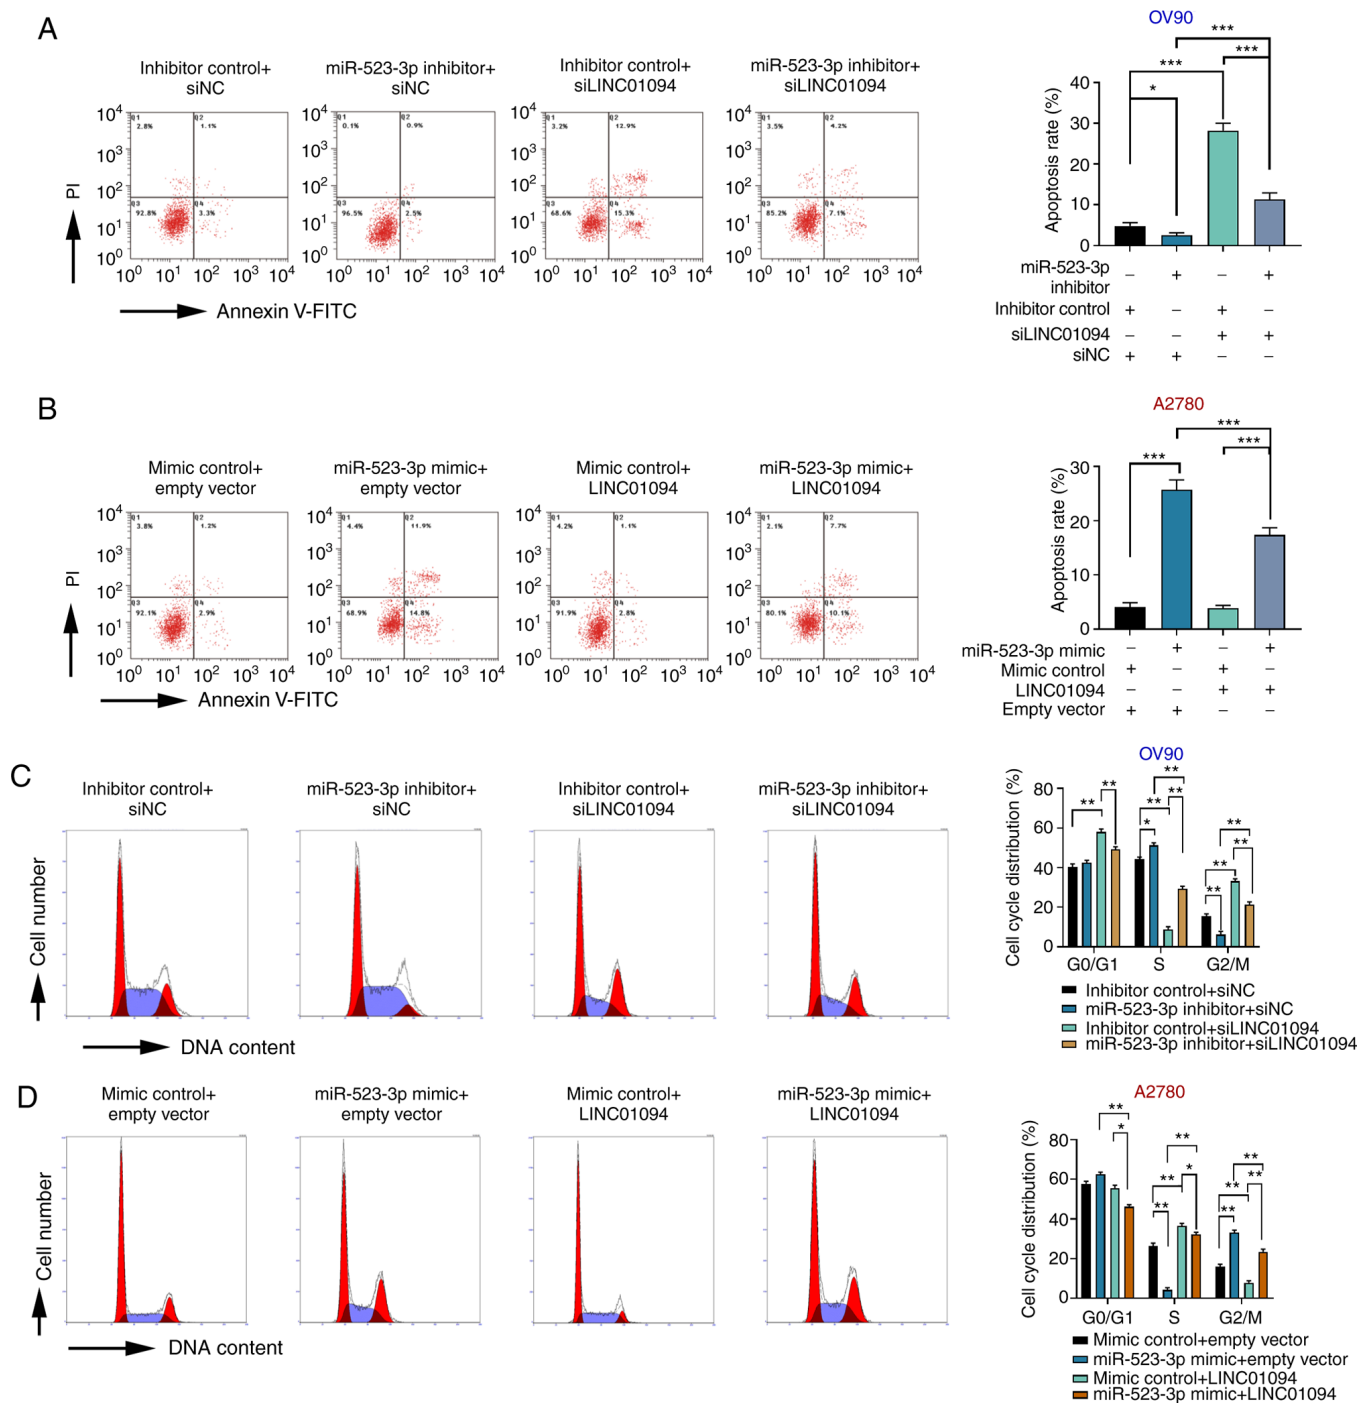

Supplement: Supplementary_Data.pdf [file Supplementary_Data.pdf]
